# Supplementary material for: Influence of Cellulose Characteristics on Pyrolysis Suitability
Source: MDPI journal article supplement (doi:10.3390/pr9091584), 2021-09-04
Supplement: s1 [file s1]

Supplementary Materials for:

# Influence of Cellulose Characteristics on Pyrolysis Suitability

María E. Eugenio<sup>1</sup>, Mercedes Ruiz-Montoya<sup>2</sup>, Raquel Martín-Sampedro<sup>1</sup>, David Ibarra<sup>1</sup>, Manuel J. Díaz<sup>2</sup>

<sup>1</sup> Forest Research Center (INIA, CSIC), Ctra. de la Coruña Km 7.5, 28040 Madrid, Spain; [mariaeugenia@inia.es](mailto:mariaeugenia@inia.es) (M.E.E.); [ibarra.david@inia.es](mailto:ibarra.david@inia.es) (D.I.); [raquel.martin@inia.es](mailto:raquel.martin@inia.es) (R.M.-S.)

<sup>2</sup> Pro2TecS-Chemical Engineering Department, Research Center in Technology of Products and Chemical Processes, Campus El Carmen, University of Huelva, 21071 Huelva, Spain; [dblanco@diq.uhu.es](mailto:dblanco@diq.uhu.es) (M.J.D.); [mmontoya@uhu.es](mailto:mmontoya@uhu.es) (M.R.-M)

\* Correspondence: [dblanco@diq.uhu.es](mailto:dblanco@diq.uhu.es) (M.J.D), Tel.: +34 959 21 99 90; [ibarra.david@inia.es](mailto:ibarra.david@inia.es) (D.I.), Tel.: +34 913 47 39 48

## THERMOGRAVIMETRIC ANALYSIS AT DIFFERENT HEATING RATES

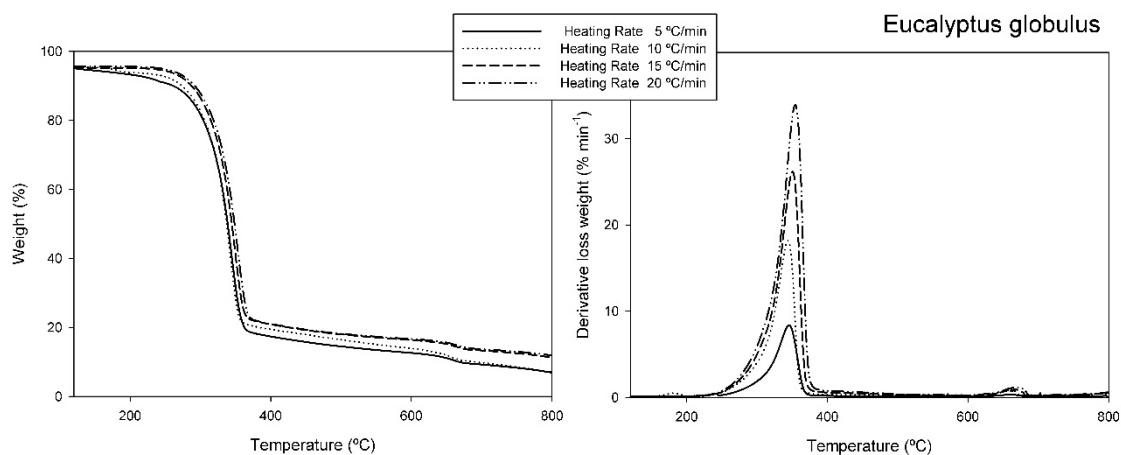

**Figure S1.** TGA and DTG for *Eucalyptus globulus* cellulose sample at different heating ratio.

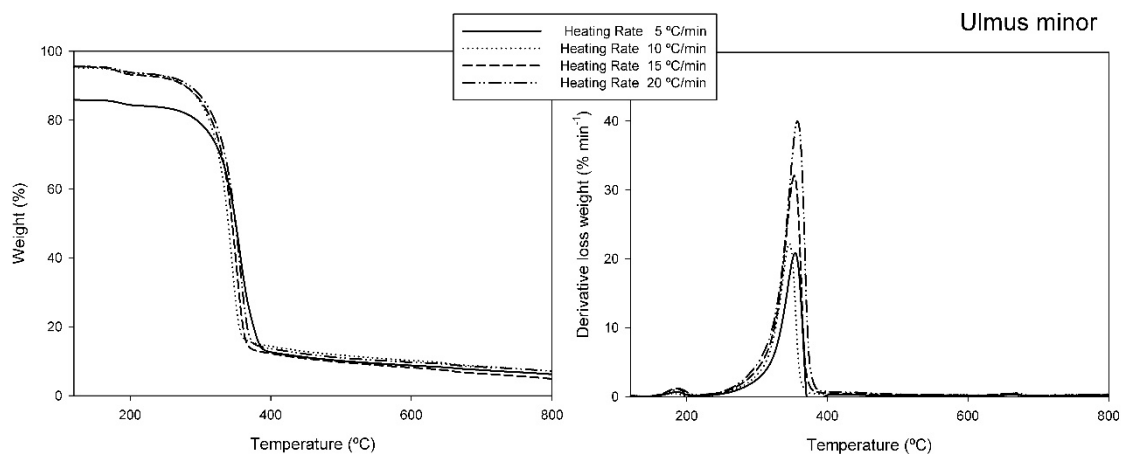

**Figure S2.** TGA and DTG for *Ulmus minor* cellulose sample at different heating ratio.

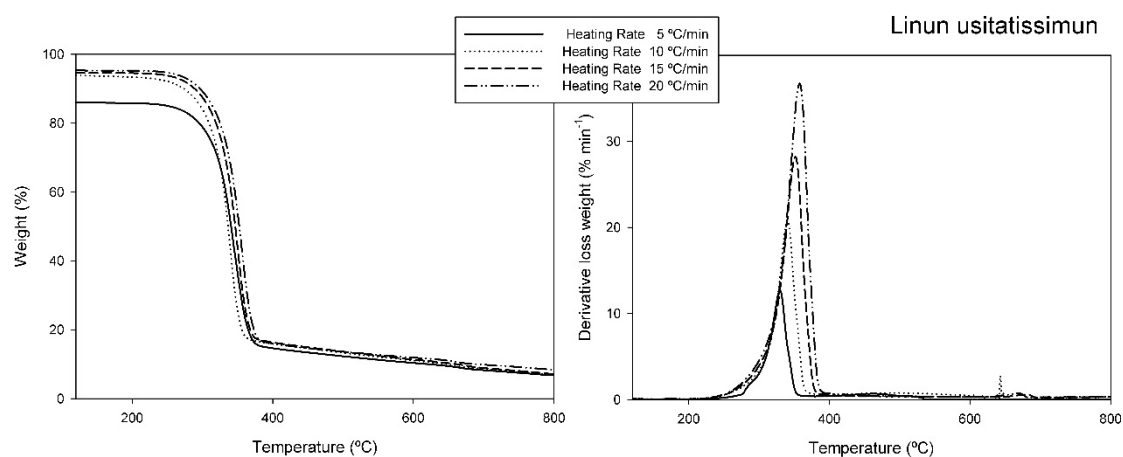

**Figure S3.** TGA and DTG for *Linum usitatissimum* cellulose sample at different heating ratio.

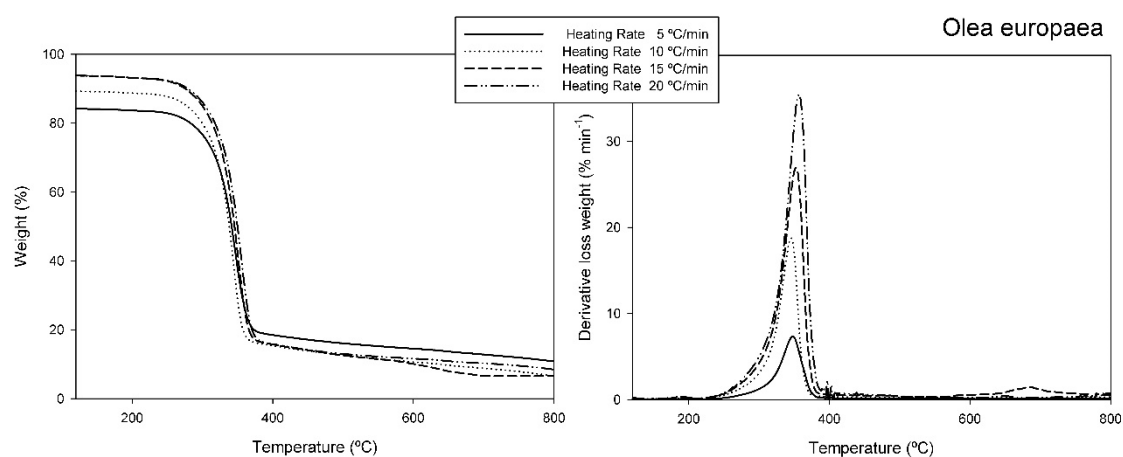

**Figure S4.** TGA and DTG for *Olea europaea* cellulose sample at different heating ratio.

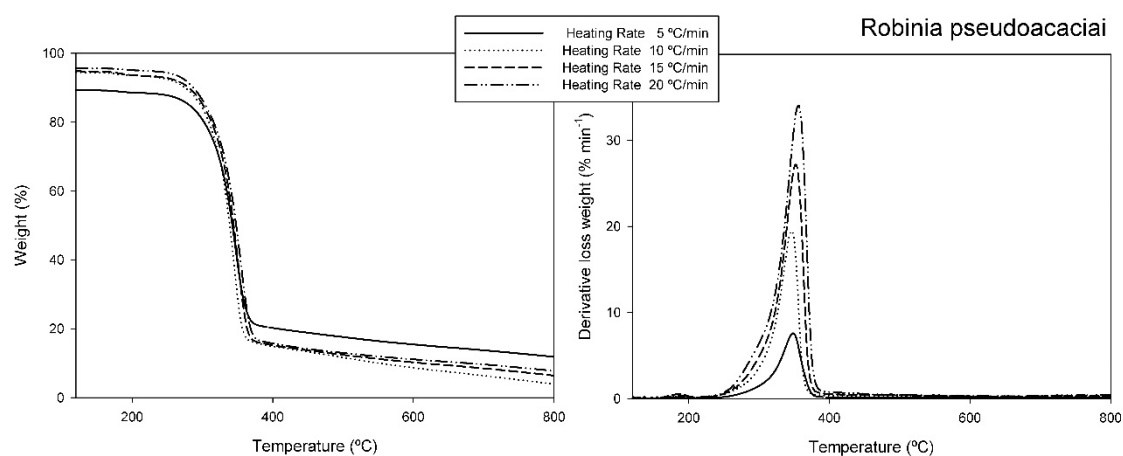

**Figure S5.** TGA and DTG for *Robinia pseudoacacia* cellulose sample at different heating ratio.

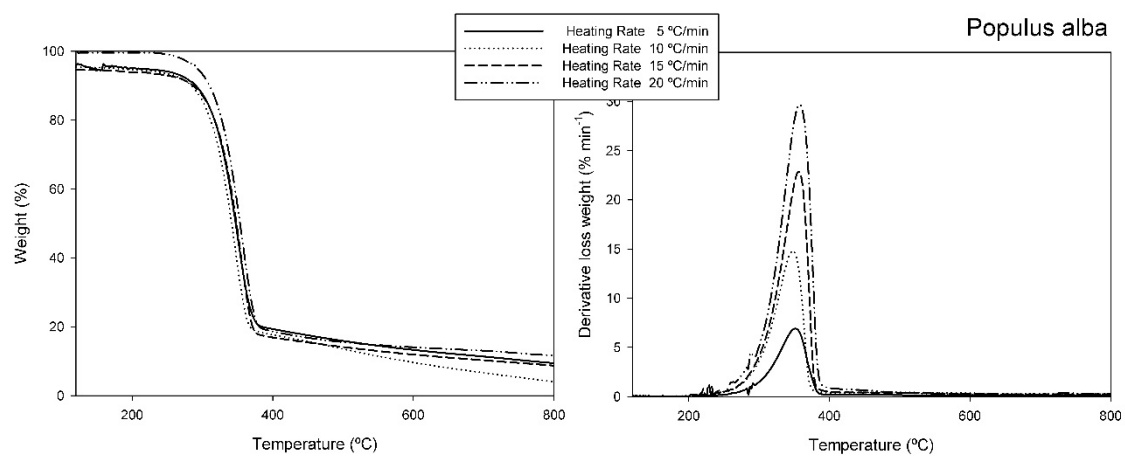

**Figure S6.** TGA and DTG for *Populus alba* cellulose sample at different heating ratio.
